# Supplementary material for: Should we depend on reference intervals from manufacturer package inserts? Comparing TSH and FT4 reference intervals from four manufacturers with results from modern indirect methods and the direct method
Source: publisher site journal article supplement (doi:10.1515/cclm-2023-1237), 2024-01-11
Supplement: Supplementary file 1 [file j_cclm-2023-1237_suppl_001.docx]

**Supplemental Materials and Methods**

**Analytical procedures**

*TSH assays*

The Roche Elecsys TSH assay (for Modular analytics E170, cobas  e411, cobas e601, cobas e602 and e801) is an electrochemiluminescence immunoassay (ECLIA) with a biotinylated monoclonal TSH-specific mouse antibody and a monoclonal TSH-specific mouse antibody labeled with a ruthenium complex. The Abbott Achitect and Alinity i TSH assays are identical chemiluminescent microparticle immunoassays (CMIA) with a monoclonal TSH-specific mouse antibody (coated to microparticles) and a monoclonal TSH-specific mouse antibody labeled with acridinium. The Beckman Access TSH (3rd IS) assay (for Beckman Unicel DxI) is an electrochemiluminescence immunoassay (ECLIA) with a monoclonal TSH-specific mouse antibody (coated to microparticles) and a monoclonal TSH-specific mouse antibody labeled with an alkaline phosphatase conjugate. The Siemens TSH 3-Ultra assay (for ADVIA Centaur and Atellica) is an electrochemiluminescence immunoassay (ECLIA) with a monoclonal TSH-specific mouse antibody (coupled to paramagnetic particles) and a monoclonal TSH-specific mouse antibody labeled with acridinium.

*FT4 assays*

The Roche Elecsys FT4 II and III assays (for Modular analytics E170, cobas  e411, cobas e601 and cobas e602) are competitive electrochemiluminescence immunoassay (ECLIA) with FT4-specific sheep polyclonal antibody labeled with a ruthenium complex and T4 coupled to magnetic microparticles. The Abbott Achitect and Alinity i Free T4 assays are identical competitive chemiluminescent microparticle immunoassays (CMIA) with a FT4-specific sheep antibody coupled to paramagnetic microparticles and T3 labeled with acridinium. The Beckman Access Free T4 assay (for Beckman Unicel DxI) is a competitive electrochemiluminescence immunoassay (ECLIA) with a monoclonal FT4-specific mouse antibody and T3-alkaline phosphatase conjugate that binds to the vacant anti-T4 antibody binding sites. The Siemens FT4 assay (for ADVIA Centaur and Atellica) is a competitive electrochemiluminescence immunoassay (ECLIA) with a polyclonal FT4-specific rabbit antibody and acridinium ester labeld T4 coupled to paramagnetic particles.

**Indirect reference intervals**

### Data stability

The stability of test results over time was assessed by plotting moving monthly medians for all participating laboratories. When laboratories employed TSH or FT4 assays from two different manufacturers between 2008 and 2022, two moving monthly median plots were constructed. To assess data stability effectively, samples collected on Saturdays, Sundays and all public Dutch holidays were excluded from the analysis due to significantly lower sample numbers and a higher prevalence of pathological cases on these dates. Short- and long-term drifts were identified using the overall median plus or minus half of the analyte reference change value (RCV) as a cut-off [1].

CVi = within-subject biological variation and CVa = permissible CVa based on estimated RI in 2022 [2, 3]. RCVs were extracted from the European Federation of Clinical Chemistry and Laboratory Medicine (EFLM) database (www.biologicalvariation.eu, accessed August 24, 2023).

*Stratification*

Data from the indirect RI study of all laboratories using the same testing platform were combined in platform specific TSH and FT4 datasets. If a laboratory median RL surpassed the ELs of the median manufacturer RIs from 2022, the data from this laboratory were excluded from the platform-specific dataset. Likewise, when in a given year, a RL was outside ELs of the median laboratory RL, the data of that year were not included in the platform specific dataset. For Roche, data from laboratories 1, 3, 4, 5 and 11 were combined for TSH and FT4, resulting in datasets of 2,525,405 TSH results and 981,325 FT4 results. For Abbott, data from laboratories 1, 2 and 5 were combined for TSH and FT4, data from laboratory 9 were excluded because median RLs surpassed the ELs of the median Abbott RIs from 2022 (TSH) and because they reported results without decimals (FT4), which hindered accurate modeling by RefineR. This resulted in datasets of 1,957,888 TSH results and 487,563 FT4 results. For Beckman, data from laboratories 6, 7 and 8 were combined for TSH, and data from laboratories 6 and 7 were combined for FT4. The data from laboratory 8 were excluded because they too reported FT4 results without decimals, resulting in datasets of 1,522,998 TSH results and 351,669 FT4 results. For Siemens, data from laboratories 6, 10, 12 and 13 were combined for TSH and data from laboratories 6, 12 and 13 were combined for FT4. The data from laboratory 10 were excluded because they too reported FT4 results as whole numbers, resulting in datasets of 1,152,401 TSH results and 257,366 FT4 results.

Indirect RIs were determined for men and women combined for the age-intervals 18-20, 20-30, 30-40, 40-50, 50-60, 60-70, 70-80, 80-90 and 90-100. Stratification was deemed necessary if ELs of median RLs were surpassed by RLs at a given age-interval. In that case, the RLs from that particular age were excluded and a new median was determined without it. This process was repeated until no age-intervals surpassed ELs. The remaining age-intervals were used to determine universal adult RIs for TSH and FT4.

### Reflex-testing bias

A number of laboratories use reflex-testing for assessment of thyroid function. It means measurement of FT4 is automatically triggered when the TSH result is outside the RI. Requesting only a TSH, an FT4, or the combination irrespective of TSH results remained possible. To evaluate whether the FT4 dataset from any laboratory was biased to non-euthyroid states as a result of a higher percentage of hypothyroid and hyperthyroid individuals, we calculated laboratory RIs for FT4 in 2022 from a subset of data containing only FT4 results from patients with normal TSH (based on the indirect TSH RIs in 2022).

**Results**

**Indirect reference intervals**

### Data stability

Moving monthly median TSH plots (Supplemental Figure 2) indicated the stability of TSH results across the studied time periods in nearly all laboratories. Only data from laboratory 9 (Abbott) showed multiple cut-off violations during the time period 2016 – 2018. Moving monthly median plots for FT4 (Supplemental Figure 3) show that FT4 results were generally less stable. Single cut-off violations were observed in laboratories 4 (Roche), 5 (Roche) and 11 (Roche). Laboratories 2 (Beckman), 3 (Roche), 5 (Abbott), 7 (Beckman), 8 (Beckman), 9 (Abbott), 10 (Siemens), 12 (Siemens) and 13 (Siemens) showed cut-off violations on more than one occasion. A negative trend was visible in the time period 2013 – 2015 in the moving monthly median FT4 plots of Abbott data from laboratories 5 and 9. When moving monthly median plots from the two Abbot laboratories spanning 2014 - 2015 were separated into two different moving median plots (until 2015 and from 2015 onwards), the plot from laboratory 5 (2015 – 2018) no longer showed cut-off violations. Laboratory 9 still showed a violation, but this was conceivably attributable to the fact that laboratory 9 reported FT4 results as whole numbers which made the median less robust. As a result of the negative trend in the Abbott data, all FT4 results from before 2015 of laboratories using Abbott were excluded from the datasets for stratification.

*Stratification*

All TSH datasets showed there was no need for age-stratification of RIs until the age of 50 years. The URLs of the age-interval 30-40 of the Beckman dataset did show a minor deviation from the equivalence limit, but this was considered insignificant as the RL of the next interval (40-50) was within ELs again. The URL of age interval 50-60 showed minor deviations from the median URL with values just outside the ELs for the Abbott, Beckman and Siemens datasets, while the URLs from the Roche dataset were within ELs until the age of 60. Altogether, we decided not to stratify TSH RIs within the age-interval 18-60 based on the results from the biggest dataset (Roche), visual inspection of all the graphs depicted in Supplemental Figure 2, and the feasibility of using the selected age-interval in the indirect estimation of universal RIs for TSH. We thereupon used both age groups 18-100 and 18-60 for indirect estimation of TSH RIs. Roche, Abbott and Siemens FT4 datasets showed there was no need for age-stratification of RIs until the age of 70 (Supplemental Figure 3). The URLs of age-intervals 50-60 and 60-70 of the Beckman dataset did already deviate from the median but as the other datasets did not corroborate this, we decided not to stratify FT4 RIs within the age-interval 18-70. We thereupon used both age groups 18-100 and 18-70 for indirect estimation of FT4 RIs.

**References**

1. Bohn MK, Bailey D, Balion C, Cembrowski G, Collier C, De Guire V, et al. Reference Interval Harmonization: Harnessing the Power of Big Data Analytics to Derive Common Reference Intervals across Populations and Testing Platforms. Clin Chem 2023;69:991-1008.

2. Haeckel R, Wosniok W, Arzideh F. Equivalence limits of reference intervals for partitioning of population data. Relevant differences of reference limits. LaboratoriumsMedizin 2016;40:199-205.

3. Haeckel R, Wosniok W, Gurr E, Peil B. Permissible limits for uncertainty of measurement in laboratory medicine. Clin Chem Lab Med 2015;53:1161-71.
